# Supplementary material for: Short-chain fatty acids induced lung tumor cell death and increased peripheral blood CD4+ T cells in NSCLC and control patients ex vivo
Source: PubMed Central journal article supplement (PMC11033355; doi:10.3389/fimmu.2024.1328263), 2024-04-08

## *Supplementary Material*

### **Short-chain fatty acids induced lung tumor cell death and peripheral blood CD4+ T cells in NSCLC and control patients ex vivo**

Carolyn D. Thome<sup>1</sup>, Patrick Tausche<sup>1</sup>†, Katja Hohenberger<sup>1</sup>†, Zuqin Yang<sup>1</sup>, Susanne Krammer<sup>1</sup>, Denis I. Trufa<sup>2,3,4</sup>, Horia Sirbu<sup>2,3,4</sup>, Joachim Schmidt<sup>5</sup> and Susetta Finotto<sup>1,3,4\*</sup>

<sup>1</sup>Department of Molecular Pneumology, University Medical School Hospital Erlangen (UKER) Friedrich-Alexander-University (FAU) Erlangen-Nürnberg, Germany

<sup>2</sup>Department of Thoracic Surgery, University Medical School Hospital Erlangen (UKER), Friedrich-Alexander University of Erlangen-Nürnberg (FAU), Erlangen, Germany.

<sup>3</sup>Bavarian Cancer Research Center and Comprehensive Cancer Center Erlangen-EMN (CCC ER-EMN), Erlangen, Germany

<sup>4</sup>Comprehensive Cancer Center Erlangen-EMN (CCC ER EMN), Erlangen, Germany

<sup>5</sup>Department of Anesthesiology, University Medical School Hospital Erlangen (UKER), Friedrich-Alexander University of Erlangen-Nürnberg (FAU), Erlangen, Germany.

†These authors have contributed equally to this work

**\* Corresponding Author:**

Prof. Dr. Dr. Susetta Finotto

[Mail: susetta.finotto@uk-erlangen.de](mailto:susetta.finotto@uk-erlangen.de)

<http://www.molekulare-pneumologie.uk-erlangen.de>

Department of Molecular Pneumology

Friedrich-Alexander-Universität Erlangen-Nürnberg

Hartmannstraße 14

91052 Erlangen, Germany

**Supplementary Figure S1. Effect of SB on gene expression in treated A549** (A) Schematic illustration of the experimental design.  $5 \times 10^5$  A549 cells per well were incubated for 48 with 200mg/dl glucose or without and SB concentrations increased from 0mM over 1mM to 5mM SB with or without additionally 25ng/ml rhIFN- $\gamma$ ; (B) qPCR analysis of relative IFNGR1/RPL30 mRNA expression in SB treated A549, (n=4); (C) qPCR analysis of relative IFNGR1/RPL30 mRNA expression in SB and rhIFN- $\gamma$  treated A549, (n=4); (D) qPCR analysis of relative Casp9/RPL30 mRNA expression in SB treated A549, (n=4); (E) qPCR analysis of relative Casp8/RPL30 mRNA expression in SB treated A54, (n=3); (F) qPCR analysis of relative Bcl-2/RPL30 mRNA expression in SB treated A549, (n=1); (G) qPCR analysis of relative Bax/RPL30 mRNA expression in SB treated A549, (n=1); (H) qPCR analysis of relative CDKN1B/RPL30 mRNA expression in SB treated A549, (n=4); (I) qPCR analysis of relative CDK2/RPL30 mRNA expression in SB treated A549, (n=4); (J) qPCR analysis of relative CDKN1B/RPL30 mRNA expression in SB treated A549 p(200mg/dl glucose: 0mM vs. 5mM SB)=0.1730 (n=4); One-way ANOVA test was used for figure (B-J). All data are presented as mean values  $\pm$  SEM. Parts of the figure were drawn by using pictures from Servier Medical Art and is licensed under a Creative Commons Attribution 3.0 Unported License (<https://creativecommons.org/licenses/by/3.0/>).

**Supplementary Figure S2. Gating strategies for different lymphocyte subpopulations in PBMC.**

Representative flow cytometry dot plots of PBMC from a control patient were generated to show the gating strategies. To identify distinct lymphocyte subsets, cells were prepared and stained with fluorochrome-labeled antibodies as outlined in the methodology section. Initially, doublets were excluded by gating on singlets using FSC-A against FSC-H. Next, lymphocytes were gated using FSC-A against SSC-A. To include only viable cells, staining with Zombie Aqua Dye was employed. For

NK cells, gating was performed on CD3<sup>-</sup> cells, followed by gating on CD56<sup>+</sup> cells. T cells were identified by gating on CD3<sup>+</sup> cells, and subsequently on CD4<sup>+</sup> or CD8<sup>+</sup> T cells. Further investigation of CD8<sup>+</sup> T cells included assessing the expression of granzyme B or IFN- $\gamma$ . Data sets were analyzed using Kaluza Flow Cytometry Software v2.1 (Beckman Coulter, Inc.).

**Supplementary Figure S3. CD8<sup>+</sup> TEM, CD4<sup>+</sup> TEM (A)** Percentages of CD62L-CCR7<sup>-</sup> T cells gated on CD8<sup>+</sup> CD3<sup>+</sup> Zombie<sup>-</sup> lymphocytes in control, smoker and tumor patients analyzed by flow cytometry (n<sup>control</sup>=4; n<sup>smoker</sup>=4; n<sup>tumor</sup>=7); **(B)** Percentages of CD62L-CCR7<sup>-</sup> T cells gated on CD4<sup>+</sup> CD3<sup>+</sup> Zombie<sup>-</sup> lymphocytes in control, smoker and tumor patients analyzed by flow cytometry (n<sup>control</sup>=4; n<sup>smoker</sup>=4; n<sup>tumor</sup>=7). One-way ANOVA test was used for figure (A right panel, B) Kruskal-Wallis test was used for figure (A left and middle panel). All data are presented as mean values  $\pm$  SEM.

**Supplementary Table S1: List of cell lines**

|                                        |
|----------------------------------------|
| <b>Experimental models: Cell lines</b> |
| Human A549 LUAD                        |
| Human H520                             |
| Patient derived cells                  |

**Supplementary Table S2: List of cell culture supplements**

| <b>Reagent</b>  | <b>Source</b> | <b>Identifier</b> |
|-----------------|---------------|-------------------|
| rhIFN- $\gamma$ | Immunotools   | Cat#11343534      |
| Sodium Butyrate | Sigma Aldrich | Cat#B5887-1G      |

|             |               |               |
|-------------|---------------|---------------|
| Human aCD3  | BD Pharmigen  | Cat#555329    |
| Human aCD28 | BD Pharmingen | Cat#555725    |
| PMA         | Sigma Aldrich | Cat#524400    |
| Ionomycin   | Sigma         | Cat#I3909-1ML |
| Golgistop   | BD Pharmingen | Cat#51-2092KZ |

**Supplementary Table S3: Clinical Data of the Cohort analyzed in this study**

| <b>Patient-Code</b> | <b>Histological classification</b> | <b>Grading</b> | <b>TNM-stadium</b> | <b>Age</b> | <b>Gender</b> |
|---------------------|------------------------------------|----------------|--------------------|------------|---------------|
| MP-174              | LUAD-LUSC                          | G3             | IA2                | 74         | Female        |
| MP-175              | LUAD                               | G2             | IB                 | 64         | Male          |
| MP-176              | LUSC                               | G3             | IA3                | 73         | Male          |
| MP-177              | LUAD                               | G3             | IA3                | 67         | Female        |
| MP-178              | LUAD                               | G3             | IA2                | 67         | Male          |
| MP-179              | LUSC                               | G3             | IA3                | 83         | Male          |
| MP-180              | LUSC                               | G3             | IIIB               | 65         | Male          |
| MP-181              | LUSC                               | G3             | IIB                | 81         | Male          |
| MP-182              | LUAD                               | G1             | IIIA               | 55         | Female        |
| iK1                 | n.a.                               | n.a.           | n.a.               | 54         | Female        |
| iK11                | n.a.                               | n.a.           | n.a.               | 46         | Male          |
| iK12                | n.a.                               | n.a.           | n.a.               | 24         | Male          |

|       |      |      |      |    |        |
|-------|------|------|------|----|--------|
| iK13  | n.a. | n.a. | n.a. | 34 | Female |
| iK14  | n.a. | n.a. | n.a. | 56 | Female |
| iK15  | n.a. | n.a. | n.a. | 44 | Female |
| CN529 | n.a. | n.a. | n.a. | 27 | male   |

Abbreviations: Histological Classification: LUAD= Lung Adenocarcinoma, LUSC= Lung Squamous cell carcinoma; Histopathological Grading: G1 = well differentiated, G2 = moderately differentiated, G3 = poorly differentiated; n.a.=not applicable

TNM: T: describes the size of primary tumor, N: describes presence or absence and numbers of metastasis in the nearby lymph nodes, M: describes presence or absence of distant metastasis

#### Supplementary Table S4: Cell culture media used for human experiments

| Medium                          | Ingredients                                                                                                                                                                                                                                                                          |
|---------------------------------|--------------------------------------------------------------------------------------------------------------------------------------------------------------------------------------------------------------------------------------------------------------------------------------|
| RPMI 0 mg/dl glucose            | 500 ml Gibco™ RPMI 1640 Medium, Thermo Fisher Scientific, no glucose (cat# 11879020); 50 ml heat-inactivated fetal bovine serum (FCS), Sigma-Aldrich (cat# S0615); 2mM L-Glutamine, anprotec (cat# AC-AS-0001); 5 ml Penicillin-Streptomycin (Pen/Strep), anprotec (cat# AC-AB-0024) |
| RPMI 200 mg/dl glucose          | 500 ml Gibco™ RPMI 1640 Medium, Thermo Fisher Scientific (cat# 21875091); 50 ml heat-inactivated fetal bovine serum (FCS), Sigma-Aldrich (cat# S0615); 2mM L-Glutamine, anprotec (cat# AC-AS-0001); 5 ml Penicillin-Streptomycin (Pen/Strep), anprotec (cat# AC-AB-0024)             |
| Pneumacult Ex Plus Basal Medium | 490ml Pneumacult Ex Plus Basal Medium, Stemcells Technologies™ (cat# 05041); 500µl Hydrocortisone stock, Stemcells Technologies™ (cat#07925); 10ml 10xSupplements                                                                                                                    |
|                                 | Pneumacult + Medium<br><br>10ml Pneumacult Ex Plus Basal medium (with Supplements and Hydrocortisone); 100µl Antibiotikum/Antimykotikum (Gibco cat#15240096); 50µl Gentamycin, Sigma Aldrich (cat#G1272-100ML)                                                                       |
|                                 | Pneumacult++ Medium                                                                                                                                                                                                                                                                  |

|  |                                                                                                                                                 |
|--|-------------------------------------------------------------------------------------------------------------------------------------------------|
|  | 10ml Pneumacult +; 500µl heat-inactivated fetal bovine serum (FCS), Sigma-Aldrich (cat# S0615); 200µl Sodium Bicarbonate, GibCo (cat#25080-060) |
|--|-------------------------------------------------------------------------------------------------------------------------------------------------|

**Supplementary Table S5: List of human Flow Cytometry antibodies**

| <b>Reagent</b>                                      | <b>Source</b>  | <b>Identifier</b> |
|-----------------------------------------------------|----------------|-------------------|
| Zombie Aqua Dye, BV510                              | BioLegend      | Cat#423102        |
| Human TruStain FcX™ (Fc Receptor Blocking Solution) | BioLegend      | Cat#422302        |
| Mouse monoclonal anti-human-CD119, PE               | BD Biosciences | Cat#558937        |
| Mouse monoclonal anti-human-CD326, APC              | BioLegend      | Cat#324207        |
| Mouse monoclonal anti-human-CD95, APC-Fire750       | BioLegend      | Cat#305637        |
| Mouse monoclonal anti-human-CD90, AF647             | BioLegend      | Cat#328115        |
| Mouse monoclonal anti-human-CD3, APC-Fire-750       | BioLegend      | Cat#300470        |
| Mouse monoclonal anti-human-CD3, PE Cy5.5           | eBioscience    | Cat#35-0036-41    |
| Mouse monoclonal anti-human-CD4, APC                | eBioscience    | Cat#17-0048-41    |
| Mouse monoclonal anti-human-CD8, APC-Cy7            | BioLegend      | Cat#344714        |
| Mouse monoclonal anti-human-CD56, BV421             | BD Bioscience  | Cat#562752        |
| Mouse monoclonal anti-human-CD62L, BV421            | BD Bioscience  | Cat#563862        |
| Mouse monoclonal anti-human-CD197 (CCR7), Pe-Cy7    | BioLegend      | Cat#353225        |
| Mouse monoclonal anti-human- IFN- $\gamma$ , AF488  | eBioscience    | Cat#53-7319-71    |

|                                                 |               |            |
|-------------------------------------------------|---------------|------------|
| Mouse monoclonal anti-human/mouse GranzymeB, PE | BioLegend     | Cat#396405 |
| AnnexinV                                        | BD Pharmingen | Cat#550474 |
| Propidium Iodide                                | BD Pharmingen | Cat#556463 |
| AnnexinVPI-Binding Buffer                       | BD Pharmingen | Cat#556454 |

**Supplementary Table S6: List of primers used for Quantitative Real-Time PCR**

| Gene    | Primer Sequence                                                                 |
|---------|---------------------------------------------------------------------------------|
| hRPL30  | fw: 5' – CTGGTGCCATCACTACAGTGG – 3'<br>rev: 5' – CCAGTCTGTTCTGGCATGCTTC – 3'    |
| hIFNGR1 | fw: 5' – GTAGCAGCATGGCTCTCCTCT – 3'<br>rev: 5' – ATTAGTTGGTGTAGGCACTGAGGAC – 3' |
| hCDKN1A | fw: 5' – CTGGGGATGTCCGTCAGAAC – 3'<br>rev: 5' – CATTAGCGCATCACAGTCGC – 3'       |
| hCDK1   | fw: 5' – ACTACAGGTCAAGTGGTAGC – 3'<br>rev: 5' – TCCCGAATTGCAGTACTAGG – 3'       |
| hFASR   | fw: 5' – TGAAGGACATGGCTTAGAAGTG – 3'<br>rev: 5' – GGTGCAAGGGTCACAGTGTT – 3'     |
| hCDK2   | fw: 5' –CTCTCCCCTCATCAAGAGC– 3'<br>rev: 5' – GGCTAGTCCAAAGTCTGCTA – 3'          |
| hCDkN1B | fw: 5' – CTAGAGGGCAAGTACGAGTG – 3'<br>rev: 5' – ATGCGTGCCTCAGAGTTAG – 3'        |

|        |                                                                            |
|--------|----------------------------------------------------------------------------|
| hCasp9 | fw: 5' – GTCCTACTCTACTTTCCCAGG– 3'<br>rev: 5' –CAAAGATGTCGTCCAGGGTC– 3'    |
| hCasp8 | fw: 5' – AAGCAAACCTCGGGGATACT – 3'<br>rev: 5' – GGGGCTTGATCTCAAAATGA – 3'  |
| hBcl-2 | fw: 5' –GGCCTTCTTTGAGTTCGGTG– 3'<br>rev: 5' –AGTCATCCACAGGGCGAT– 3'        |
| hBax   | fw: 5' – TTTCGTTCAGGGTTTCATCT – 3'<br>rev: 5' – CACTTGAAGGTTGCCGTCAGA – 3' |



# Supplementary Fig. S1

0mM SB     25ng/ml IFN $\gamma$   
 1mM SB     25ng/ml IFN $\gamma$  + 1mM SB  
 5mM SB     25ng/ml IFN $\gamma$  + 5mM SB

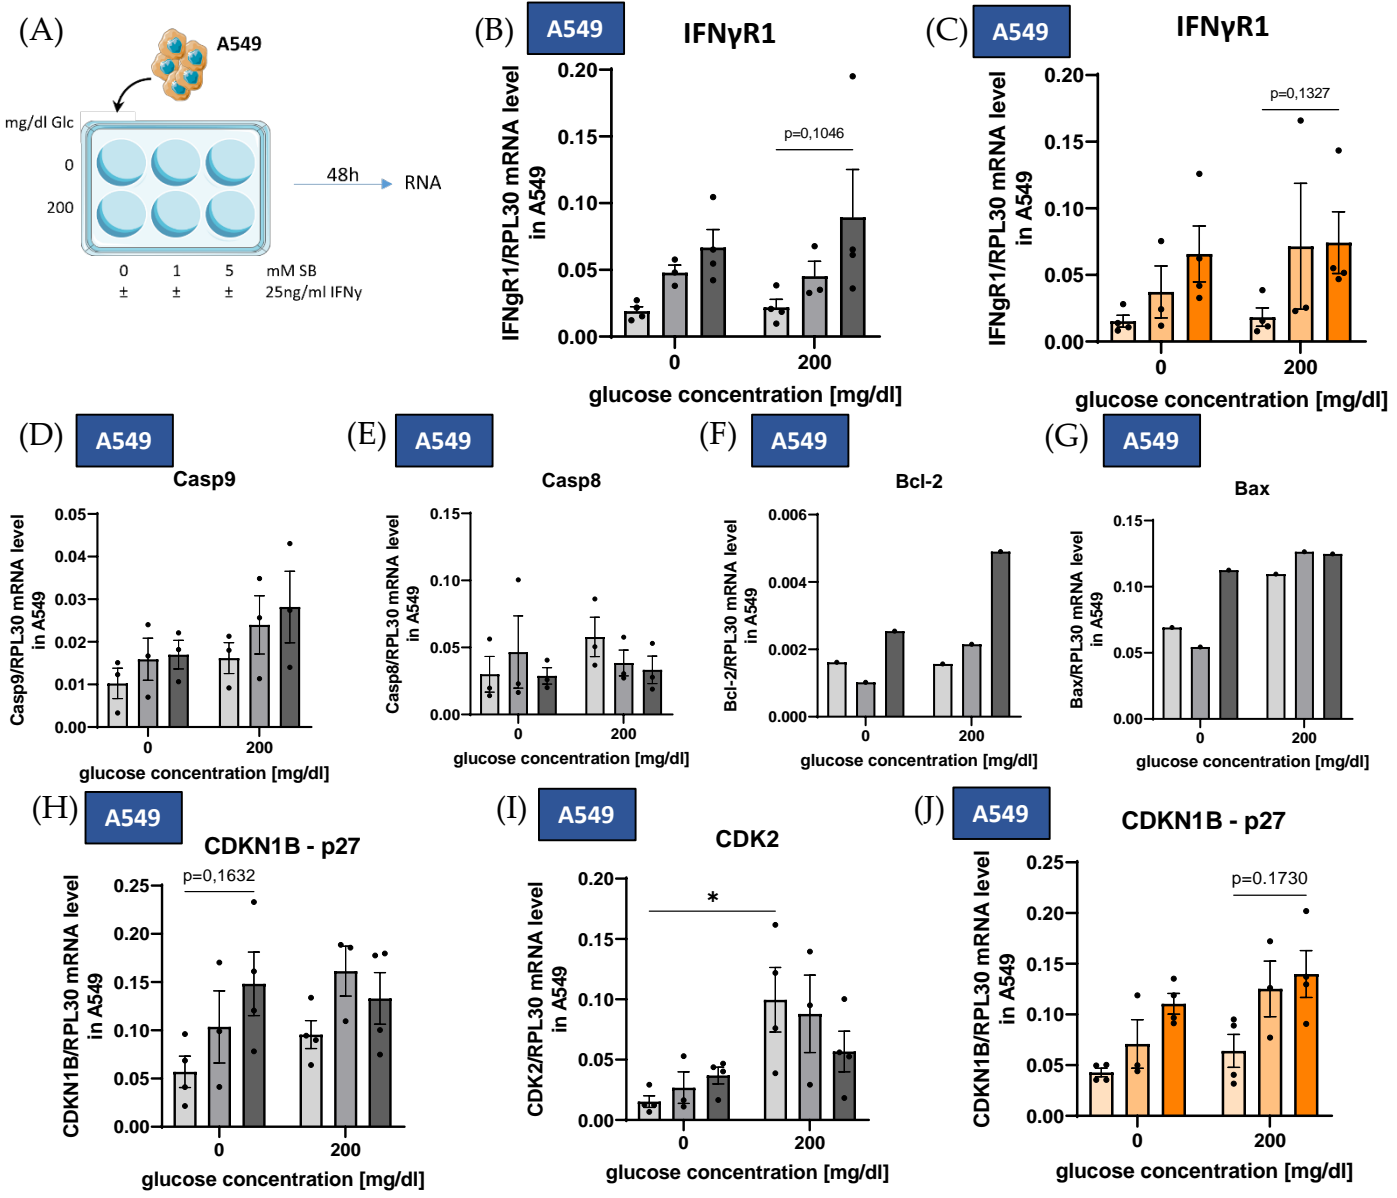

# Supplementary Fig S2

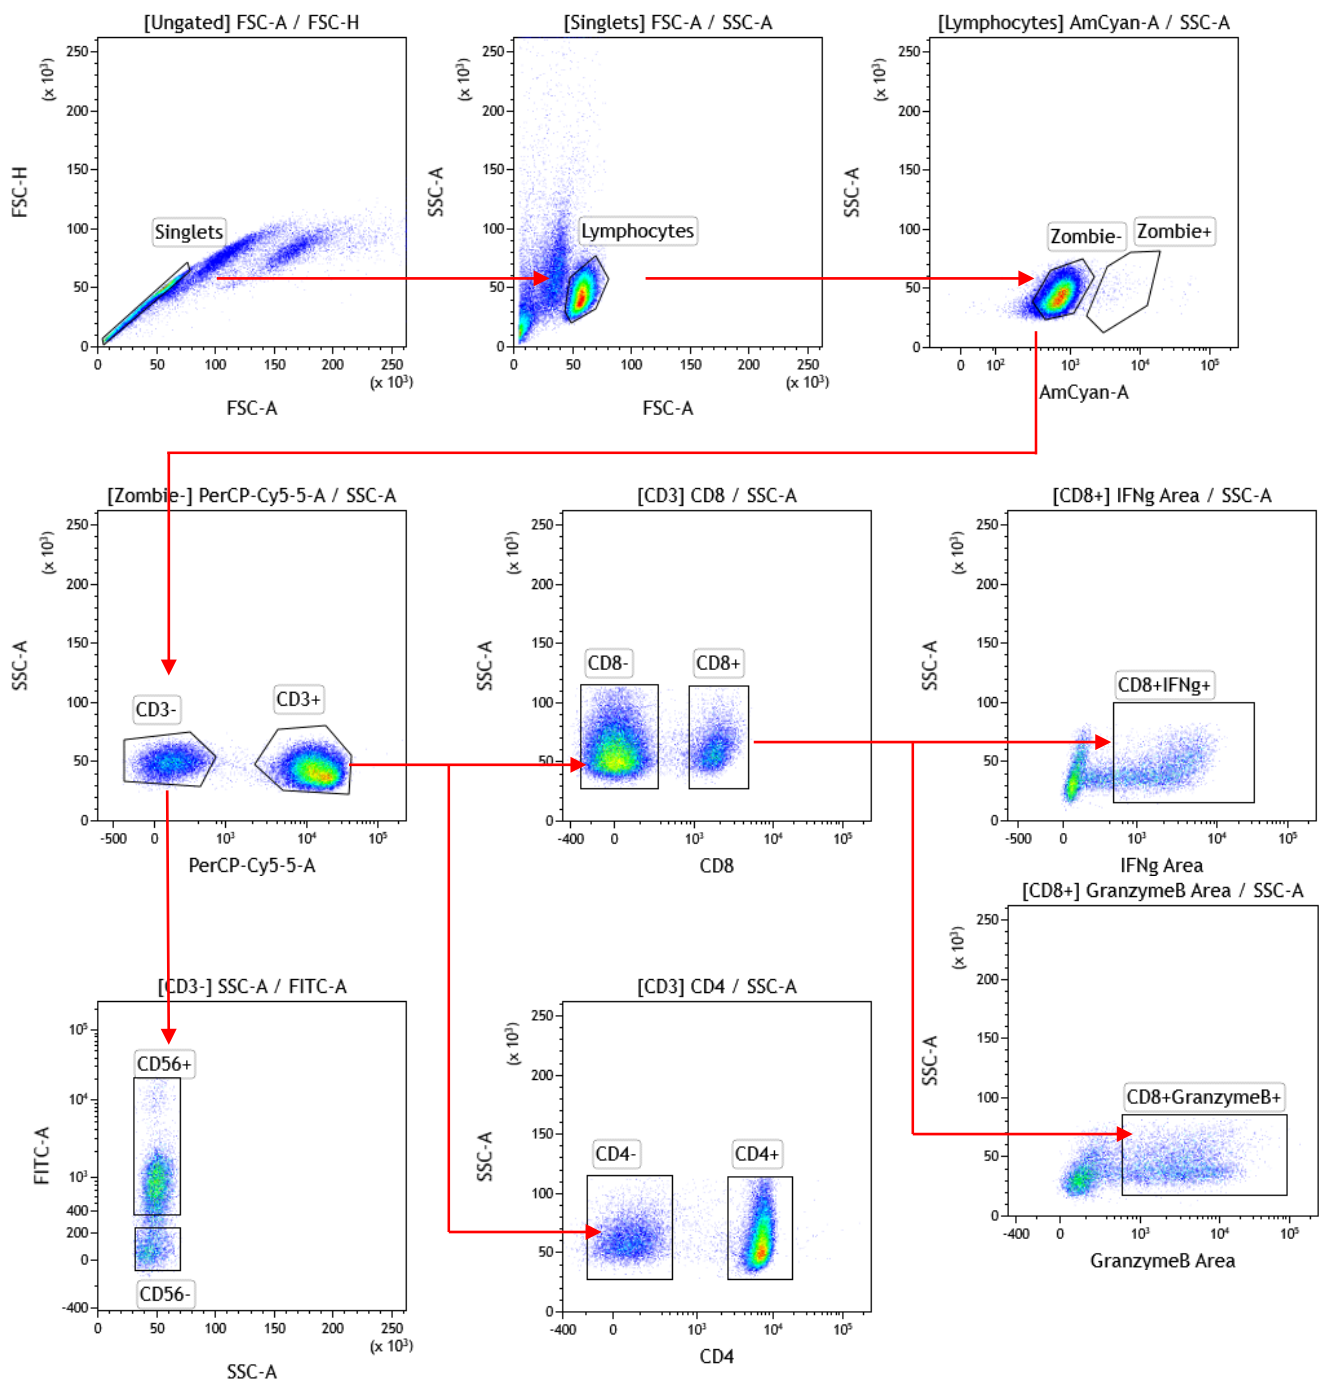

# Supplementary Fig S3

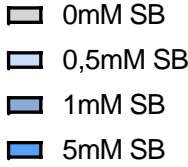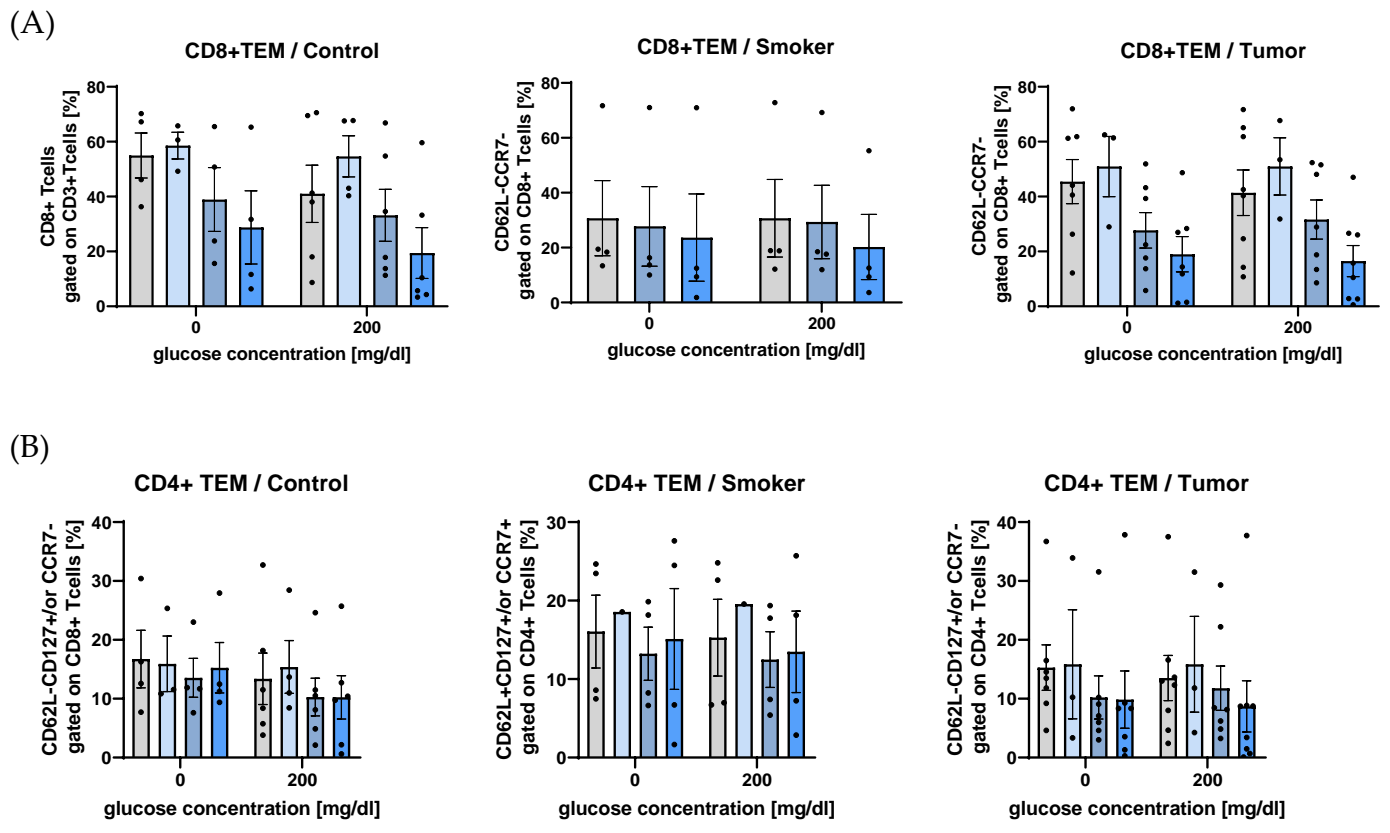

Supplement: DataSheet_1.pdf [file DataSheet_1.pdf]
